# Supplementary material for: Acidic ionic liquid modified silica gel for adsorption and separation of bovine serum albumin (BSA)
Source: Royal Society of Chemistry journal article supplement (doi:10.1039/c6ra23372d), 2016-01-01
Supplement: c6ra23372d1.pdf [file c6ra23372d1.pdf]

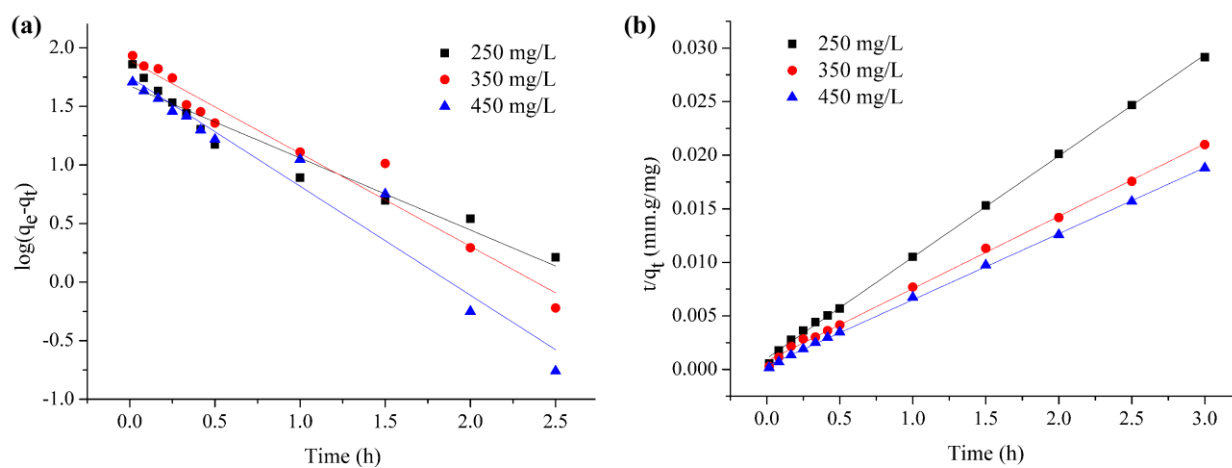

Supplemental Material 1 The fitted plots of the pseudo-first-order model (a) and pseudo-second-order kinetic model (b)

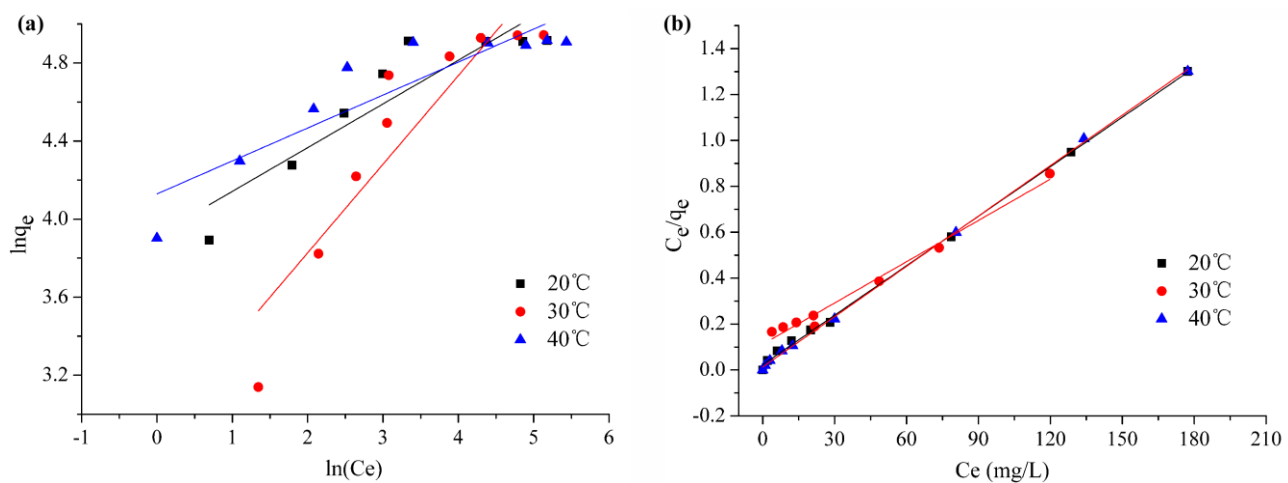

Supplemental Material 2 The fitted plots of Freundlich equation (a) and Langmuir equation (b)

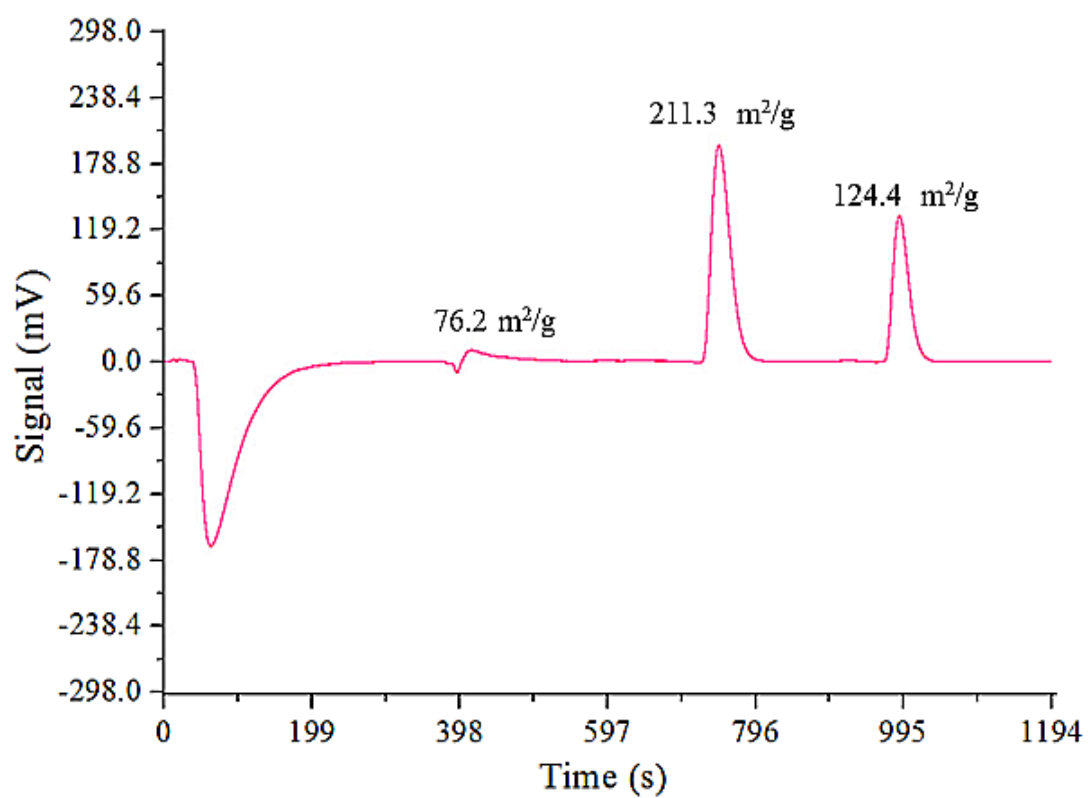

Supplemental Material 3 BET surface area of SiO<sub>2</sub> Im<sup>+</sup> HSO<sub>4</sub><sup>-</sup> before and after adsorption
